# Supplementary material
Source: MDPI journal article supplement (https://www.mdpi.com/2311-5637/10/1/37)
Supplement: s1 [file s1]

Supplementary Table S1 Primers used in this study

| Name    | Sequence                                           |
|---------|----------------------------------------------------|
| lox-F   | CGCAATGCTGTAAAGGTTTCG                              |
| af-R    | GGATGCTGCGAATAAAACAGCAG                            |
| qGAP-F  | CCAGCGGCAACAAGATCAAC                               |
| qGAP-R  | CTCCTCGTTGACACCGACAA                               |
| qaf-F   | GAGATTTCCATCTATTTTCACTG                            |
| qaf-R   | TCTTTTCTCGAGAGAAACACC                              |
| AFT1-F  | ACGGAATTCATGTCTTTGATTCCAGAGAAGAAGC                 |
| AFT1-R  | GTCTAAGGGCGGCCGCTCAGAACTTCATAAAGGCGTTGTC           |
| eIF4A-F | ACGGAATTCATGTCTGAAGGTATTATTGAAATC                  |
| eIF4A-R | GTCTAAGGGCGGCCGCTCAAGACTCATTAACTTCCTCAGTCTC        |
| eIF4E-F | ACGGAATTCATGTCTCAGAGACTGAAAACGCTCCTC               |
| eIF4E-R | GTCTAAGGGCGGCCGCTCAAATGCTGAAAGAAGGTACGTTCTTG       |
| eIF4G-F | ACGGAATTCATGTCCAATAAGAACGTGGATACAG                 |
| eIF4G-R | GTCTAAGGGCGGCCGCTCAAACCTCCTGTTCTCTTCTTGCTC         |
| PAB1-F  | ACGGAATTCATGTCTGTCTGATACCAAGGAAGTTC                |
| PAB1-R  | GTCTAAGGGCGGCCGCTCAGTTTGCTTGTGCATCCGCTTGCTG        |
| SSA1-F  | ACGGAATTCATGCCAGCTGTCGGTATTGAT                     |
| SSA1-R  | GTCTAAGGGCGGCCGCTCAATCGACTTCCTCAACAGTTGGTCC        |
| SSA4-F  | ACGGAATTCATGGGTAAATCAATTGGAATTG                    |
| SSA4-R  | GTCTAAGGGCGGCCGCTCAATCGACTTCTTCCACGGTTGGTC         |
| YDJ1-F  | ACGGAATTCATGGTTAGAGAAACAAAGTTATAT                  |
| YDJ1-R  | GTCTAAGGGCGGCCGCTCACTGAGAAGCACATTGGACACC           |
| SIS1-F  | ACGGAATTCATGGTGAAAGAACAAGGACTATAC                  |
| SIS1-R  | GTCTAAGGGCGGCCGCTCAAAACGCTTTGGAAATGGCATCTCTTT<br>G |
| SNL1-F  | ACGGAATTCATGCTTGATTTATCCCCATTC                     |
| SNL1-R  | GTCTAAGGGCGGCCGCTCAAAGGTCTCCGAGAACAGCTTT           |
| GLR1-F  | ACGGAATTCATGCCCTCAATTGCCAGCATTAC                   |
| GLR1-R  | GTCTAAGGGCGGCCGCTCAAACCATTGTCACTAATTCTTCAGC        |
| GPX1-F  | ACGGAATTCATGTCTTCATTTTATGATCTGGCC                  |
| GPX1-R  | GTCTAAGGGCGGCCGCTCATTCTTTAATAGTTCTTCAATCTTG        |
| PDI-F   | ACGGAATTCATGCAATTCAACTGGAATATT                     |
| PDI-R   | GTCTAAGGGCGGCCGCTCAAAGCTCGTCGTGAGCGTCTGC           |
| BIP-F   | ACGGAATTCATGCTGTCGTGTTAAACCATCT                    |
| BIP-R   | GTCTAAGGGCGGCCGCTCACAACATCATGATCATAGTC             |
| ERJ5-F  | ACGGAATTCATGAACTACACCTTGATTC                       |
| ERJ5-R  | GTCTAAGGGCGGCCGCTCATTTCTTCTACGTCCACCGGATTG         |
| SIL1-F  | ACGGAATTCATGAAAGTGACATTATCTGTGTTAG                 |
| SIL1-R  | GTCTAAGGGCGGCCGCTCATAACTCATCGGAGAAACCTTTCC         |
| LHS1-F  | ACGGAATTCATGAGAACACAAAAGATAGTA                     |
| LHS1-R  | GTCTAAGGGCGGCCGCTCACAACATCATGGGATGTTTG             |
| JEM1-F  | ACGGAATTCATGAGGCTGAACTATCTCTTTTTT                  |
| JEM1-R  | GTCTAAGGGCGGCCGCTCATCTATGTCCTTTATTGAATCCGCC        |
| SCJ1-F  | ACGGAATTCATGAAGATATGGCTGGTACTTC                    |
| SCJ1-R  | GTCTAAGGGCGGCCGCTCACAATTCGTCTCTAATTTGTTGCGG        |
| SSO1-F  | ACGGAATTCATGAGTAACAGTATAATCCG                      |
| SSO1-R  | GTCTAAGGGCGGCCGCTCATCTTCCCCAGTTTCCGACACC           |
| SEC1-F  | ACGGAATTCATGGCTTCTGATCTGATTAACCTC                  |
| SEC1-R  | GTCTAAGGGCGGCCGCTCATTTCAAAATTCTTCAGCTTATC          |

|         |                                               |
|---------|-----------------------------------------------|
| SEC4-F  | ACGGAATTCATGGCATCAAGAGGCACATCAAGG             |
| SEC4-R  | GTCTAAGGGCGGCCGCTCAACAACAAGACGATTTGGTGTGCGTTG |
| SEC12-F | ACGGAATTCATGATGAAACCATACACCTTAGAT             |
| SEC12-R | GTCTAAGGGCGGCCGCTCAAAGTTCATCATGATTGATATTTTC   |
| KEX2-F  | ACGGAATTCATGTATTTGCCAGCACTTCGCTTAG            |
| KEX2-R  | GTCTAAGGGCGGCCGCTCACAATGCCGCACGTTTGGGATGTTT   |

---
